# Supplementary material for: Predictive models of poly(ethylene-terephthalate) film degradation under multi-factor accelerated weathering exposures
Source: PubMed Central journal article supplement (PMC5428936; doi:10.1371/journal.pone.0177614), 2017-05-12
Supplement: pone.0177614.s006.pdf [file pone.0177614.s006.pdf]

**S6 Appendix. Model summary statistics for the change in haze (%) under the CyclicQUV exposure (Model 3)**

Eq S6.1 is the fitted expression using R's *lme* function for mixed-effects modeling and Eq S6.2 is the model expression with parameter estimates. Table S6.1, Table S6.2, Table S6.3, and Table S6.4 provide residuals of the fitted model, model summary statistics, coefficients of the parameter estimates of the fitted model, and the associated random effects due to individual samples, respectively, for the change in haze (%) under the CyclicQUV exposure.

$$\begin{aligned} \text{Fixed effects : Haze} &\sim (\text{Step} \times \text{Material}) + (\text{I}(\text{Step}^2) \times \text{Material}) + \text{I}(\text{Step}^3) \\ \text{Random effects : Sample} &\sim (-1 + \text{Step} + \text{I}(\text{Step}^2)) \end{aligned} \quad (\text{S6.1})$$

**Table S6.1. Standardized within-group residuals for the change in haze (%) under the CyclicQUV exposure.**

| Minimum     | 1st Quantile | Median      | 3rd Quantile | Maximum    |
|-------------|--------------|-------------|--------------|------------|
| -1.84065756 | -0.47842807  | -0.05626121 | 0.32216072   | 4.28936316 |

**Table S6.2. Model summary statistics for the change in haze (%) under the CyclicQUV exposure.**

|                                                 |                           |          |
|-------------------------------------------------|---------------------------|----------|
| Linear mixed-effects model parameters           | AIC                       | 520.148  |
|                                                 | BIC                       | 555.6044 |
|                                                 | logLik                    | -246.074 |
| Coefficients of generalized mixed-effects model | Marginal $R_m^2$          | 0.9005   |
|                                                 | Conditional $R_c^2$       | 0.9364   |
|                                                 | Fitted $R_f^2$            | 0.9502   |
|                                                 | Predictive $R^2$ (moving) | 0.8067   |
|                                                 | Predictive $R^2$ (global) | 0.8749   |

**Table S6.3. Coefficients of parameter estimates for the change in haze (%) under the CyclicQUV exposure.**

|                                      |              | Estimate  | Std. Error | DF | t value   | p-value |
|--------------------------------------|--------------|-----------|------------|----|-----------|---------|
| (Intercept)                          | $\beta_0$    | 1.166370  | 0.7925858  | 75 | 1.471601  | 0.1453  |
| MaterialUnStab                       | $\beta_{01}$ | 1.484816  | 0.0915512  | 18 | 0.360281  | 0.1905  |
| MaterialUVStab                       | $\beta_{02}$ | -1.404027 | 0.0933107  | 18 | -1.284197 | 0.2154  |
| Step                                 | $\beta_1$    | 4.135024  | 1.1284642  | 75 | 3.664294  | 0.0005  |
| Step:MaterialUnStab                  | $\beta_{11}$ | 5.079136  | 1.3310445  | 75 | 3.815903  | 0.0003  |
| Step:MaterialUVStab                  | $\beta_{12}$ | 1.299529  | 1.3248225  | 75 | 0.980908  | 0.3298  |
| I(Step <sup>2</sup> )                | $\beta_2$    | -2.395967 | 0.3494089  | 75 | -6.857201 | 0.0000  |
| MaterialUnStab:I(Step <sup>2</sup> ) | $\beta_{21}$ | -0.648207 | 0.2482269  | 75 | -2.611348 | 0.0109  |
| MaterialUVStab:I(Step <sup>2</sup> ) | $\beta_{22}$ | -0.313325 | 0.2465523  | 75 | -1.270826 | 0.2077  |
| I(Step <sup>3</sup> )                | $\beta_3$    | 0.374944  | 0.0345852  | 75 | 10.841176 | 0.0000  |

$$\begin{aligned} \text{Haze}_{ijkl} &\approx (1.1663 + 1.4848M_1 - 1.4040M_2) \\ &+ (4.1350 + 5.0791M_1 + 1.2995M_2 + b_{1i})t_{ijkl} \\ &+ (-2.3959 - 0.6482M_1 - 0.3133M_2 + b_{2i})t_{ijkl}^2 \\ &+ (0.3749)t_{ijkl}^3 + \epsilon_{ijkl} \end{aligned} \quad (\text{S6.2})$$

**Table S6.4. Random effects arisen from individual samples for the change in haze (%) under the CyclicQUV exposure.**

| Samples    | Step        | I(Step <sup>2</sup> ) | Samples    | Step        | I(Step <sup>2</sup> ) |
|------------|-------------|-----------------------|------------|-------------|-----------------------|
| sa19601.22 | -0.22312110 | 0.042253518           | sa19603.26 | 1.94828085  | -0.365829294          |
| sa19601.23 | -0.13413076 | 0.024577950           | sa19603.27 | -1.34873106 | 0.332002367           |
| sa19601.24 | 0.23867903  | -0.043398515          | sa19603.28 | -2.54838045 | 0.432626059           |
| sa19601.25 | -0.06231086 | 0.008362503           | sa19604.22 | -0.44675886 | 0.084604878           |
| sa19601.26 | -0.48216413 | 0.092330106           | sa19604.23 | -0.38338380 | 0.072438079           |
| sa19601.27 | 0.71650476  | -0.137941910          | sa19604.24 | -0.42948402 | 0.081389410           |
| sa19601.28 | -0.05345694 | 0.013816348           | sa19604.25 | 0.81979900  | -0.145873570          |
| sa19603.22 | 1.17336952  | -0.222206638          | sa19604.26 | -0.15979213 | 0.045997957           |
| sa19603.23 | 2.37422030  | -0.449617535          | sa19604.27 | 0.04918615  | -0.013514787          |
| sa19603.24 | 0.08583301  | -0.025737480          | sa19604.28 | 0.55043367  | -0.125041967          |
| sa19603.25 | -1.68459217 | 0.298762521           |            |             |                       |

Samples sa19601, sa19603, and sa19604 are for hydrolytically stabilized, unstabilized, and UV stabilized, respectively, and extensions after periods (.) are for sample replicates.
