# Supplementary material for: Predictive models of poly(ethylene-terephthalate) film degradation under multi-factor accelerated weathering exposures
Source: PubMed Central journal article supplement (PMC5428936; doi:10.1371/journal.pone.0177614), 2017-05-12
Supplement: pone.0177614.s007.pdf [file pone.0177614.s007.pdf]

**S7 Appendix. Model summary statistics for the change in haze (%) under the DampHeat, FreezeThaw, and HotQUV exposures (Model 4)**

Eq S7.1 is the fitted expression using R's *lme* function for mixed-effects modeling and Eq S7.2 is the model expression with parameter estimates. Table S7.1, Table S7.2, Table S7.3, and Table S7.4 provide residuals of the fitted model, model summary statistics, coefficients of the parameter estimates of the fitted model, and the associated random effects due to individual samples, respectively, for the change in haze (%) under the DampHeat, FreezeThaw, and HotQUV exposures.

$$\begin{aligned} \text{Fixed effects : Haze} &\sim \text{Step} + \text{I}(\text{Step}^2) + \text{I}(\text{Step}^3) + (\text{Material} \times \text{Exposure}) \\ \text{Random effects : Sample} &\sim (-1 + \text{Step} + \text{I}(\text{Step}^2)) \end{aligned} \quad (\text{S7.1})$$

**Table S7.1. Standardized within-group residuals for the change in haze (%) under the DampHeat, FreezeThaw, and HotQUV exposures.**

| Minimum     | 1st Quantile | Median      | 3rd Quantile | Maximum    |
|-------------|--------------|-------------|--------------|------------|
| -2.69377240 | -0.52656940  | -0.03260017 | 0.44209805   | 3.35057300 |

**Table S7.2. Model summary statistics for the change in haze (%) under the DampHeat, FreezeThaw, and HotQUV exposures.**

|                                                 |                           |           |
|-------------------------------------------------|---------------------------|-----------|
| Linear mixed-effects model parameters           | AIC                       | 771.3163  |
|                                                 | BIC                       | 830.6301  |
|                                                 | logLik                    | -369.6582 |
| Coefficients of generalized mixed-effects model | Marginal $R_m^2$          | 0.3124    |
|                                                 | Conditional $R_c^2$       | 0.9330    |
|                                                 | Fitted $R_f^2$            | 0.9504    |
|                                                 | Predictive $R^2$ (moving) | 0.7437    |
|                                                 | Predictive $R^2$ (global) | 0.8814    |

**Table S7.3. Coefficients of parameter estimates for the change in haze (%) under the DampHeat, FreezeThaw, and HotQUV exposures.**

|                              | Estimate     | Std. Error | DF        | t value | p-value    |        |
|------------------------------|--------------|------------|-----------|---------|------------|--------|
| (Intercept)                  | $\beta_0$    | 1.1347292  | 0.1646014 | 247     | 6.893801   | 0.0000 |
| MaterialUnStab               | $\beta_{01}$ | 0.2065741  | 0.2284317 | 54      | 0.904315   | 0.3698 |
| MaterialUVStab               | $\beta_{02}$ | -0.0118698 | 0.2283741 | 54      | -0.051975  | 0.9587 |
| ExpFreezeThaw                | $\beta_{03}$ | -0.0065295 | 0.2296292 | 54      | -0.028435  | 0.9774 |
| ExpHotQUV                    | $\beta_{03}$ | -0.0632841 | 0.2283741 | 54      | -0.277107  | 0.7828 |
| MaterialUnStab:ExpFreezeThaw | $\beta_{04}$ | -0.8185500 | 0.3238990 | 54      | -2.527177  | 0.0145 |
| MaterialUnStab:ExpHotQUV     | $\beta_{05}$ | -0.8378123 | 0.3230104 | 54      | -2.593762  | 0.0122 |
| MaterialUVStab:ExpFreezeThaw | $\beta_{06}$ | -0.6438805 | 0.3238584 | 54      | -1.988154  | 0.0519 |
| MaterialUVStab:ExpHotQUV     | $\beta_{07}$ | -0.2566150 | 0.3229697 | 54      | -0.794548  | 0.4304 |
| Step                         | $\beta_1$    | 1.8125596  | 0.1405364 | 247     | 12.897439  | 0.0000 |
| I(Step <sup>2</sup> )        | $\beta_2$    | -0.4429499 | 0.0437367 | 247     | -10.127651 | 0.0000 |
| I(Step <sup>3</sup> )        | $\beta_3$    | 0.0376986  | 0.0047331 | 247     | 7.964921   | 0.0000 |

$$\begin{aligned} \text{Haze}_{ijkl} &\approx (1.1347 + 0.2065M_1 - 0.0118M_2 - 0.0065X_1 - 0.0632X_2 - 0.8185M_1X_1 \\ &\quad - 0.8378M_1X_2 - 0.6438M_2X_1 - 0.2566M_2X_2) + (1.8125 + b_{1i})t_{ijkl} \\ &\quad + (-0.4429 + b_{2i})t_{ijkl}^2 + (0.0376)t_{ijkl}^3 + \epsilon_{ijkl} \end{aligned} \quad (\text{S7.2})$$

**Table S7.4. Random effects arisen from individual samples for the change in haze (%) under the DampHeat, FreezeThaw, and HotQUV exposures.**

| Samples    | Step        | I(Step <sup>2</sup> ) | Samples    | Step        | I(Step <sup>2</sup> ) |
|------------|-------------|-----------------------|------------|-------------|-----------------------|
| sa19601.01 | 0.46953675  | -0.040718017          | sa19603.12 | -0.31783685 | 0.062766619           |
| sa19601.02 | -0.18208398 | 0.017466198           | sa19603.13 | 0.01952239  | -0.021645695          |
| sa19601.03 | -0.18837505 | 0.002049388           | sa19603.14 | -0.47152862 | 0.053908584           |
| sa19601.04 | -0.38149174 | 0.036181351           | sa19603.15 | -0.60480581 | 0.052448490           |
| sa19601.05 | 0.20559089  | -0.049637690          | sa19603.16 | -0.38736325 | 0.028253372           |
| sa19601.06 | -0.14109839 | 0.015141054           | sa19603.17 | 0.59701978  | -0.056962687          |
| sa19601.07 | -0.34074113 | 0.015193088           | sa19603.18 | -0.12347238 | -0.003843830          |
| sa19601.08 | -0.09670152 | 0.008385913           | sa19603.19 | -0.34192974 | 0.037504921           |
| sa19601.09 | -1.02150240 | 0.084153315           | sa19603.20 | 0.21700824  | -0.060207047          |
| sa19601.10 | -0.93044983 | 0.082388895           | sa19603.21 | -0.01550491 | -0.005267559          |
| sa19601.11 | -0.92288907 | 0.094488019           | sa19604.01 | 1.61980310  | -0.140468600          |
| sa19601.12 | -0.81728734 | 0.091708785           | sa19604.02 | 0.32848557  | -0.039333078          |
| sa19601.13 | -0.76648845 | 0.088201093           | sa19604.03 | 0.98824802  | -0.091771343          |
| sa19601.14 | -0.44950794 | 0.025339026           | sa19604.04 | 1.28023462  | -0.037933825          |
| sa19601.15 | 0.58605993  | -0.050822855          | sa19604.05 | 1.48956039  | -0.093223103          |
| sa19601.16 | -1.06422090 | 0.091279500           | sa19604.06 | 1.20774495  | 0.002340892           |
| sa19601.17 | -0.75878799 | 0.061084329           | sa19604.07 | 1.39562486  | -0.074552110          |
| sa19601.18 | -0.45923827 | 0.019158641           | sa19604.08 | -0.12827906 | 0.011124302           |
| sa19601.19 | -0.80342651 | 0.081882563           | sa19604.09 | -0.15066613 | 0.011887571           |
| sa19601.20 | -0.99327181 | 0.098310528           | sa19604.10 | -0.40558449 | 0.030029471           |
| sa19601.21 | -0.72261565 | 0.052274217           | sa19604.11 | -0.12826026 | 0.007088170           |
| sa19603.01 | 1.03574321  | -0.089819188          | sa19604.12 | -0.49540327 | 0.061925320           |
| sa19603.02 | 1.39255439  | -0.120761693          | sa19604.13 | -0.42588941 | 0.045730203           |
| sa19603.03 | 1.26979699  | -0.118476301          | sa19604.14 | -0.24918395 | -0.001779984          |
| sa19603.04 | 0.75617859  | -0.099713937          | sa19604.15 | 0.08544304  | -0.007409582          |
| sa19603.05 | 0.89036192  | -0.078413499          | sa19604.16 | -0.41826724 | 0.038282114           |
| sa19603.06 | 0.83843356  | -0.080374754          | sa19604.17 | -0.81880193 | 0.070277492           |
| sa19603.07 | 1.19306106  | -0.178069822          | sa19604.18 | -0.09697980 | -0.047117489          |
| sa19603.08 | -0.01679303 | 0.001456284           | sa19604.19 | -0.74179098 | 0.067311836           |
| sa19603.09 | -0.01880191 | -0.001981931          | sa19604.20 | -0.21606112 | -0.021679183          |
| sa19603.10 | -0.15279343 | 0.009432085           | sa19604.21 | -0.31602813 | 0.052977244           |
| sa19603.11 | 0.21619143  | 0.002553930           |            |             |                       |

Samples sa19601, sa19603, and sa19604 are for hydrolytically stabilized, unstabilized, and UV stabilized, respectively, and extensions after periods (.) are for sample replicates.
